# Supplementary figures and images for: Successful Intraoperative Salvage of a Venous Congested Deep Inferior Epigastric Perforator Flap Using a Cross-thoracic Saphenous Vein Graft
Source: PubMed Central journal article supplement — Plast Reconstr Surg Glob Open. 2024 May 22;12(5):e5830. doi: 10.1097/GOX.0000000000005830 (PMC11111392; doi:10.1097/gox.0000000000005830), 2024-05-22

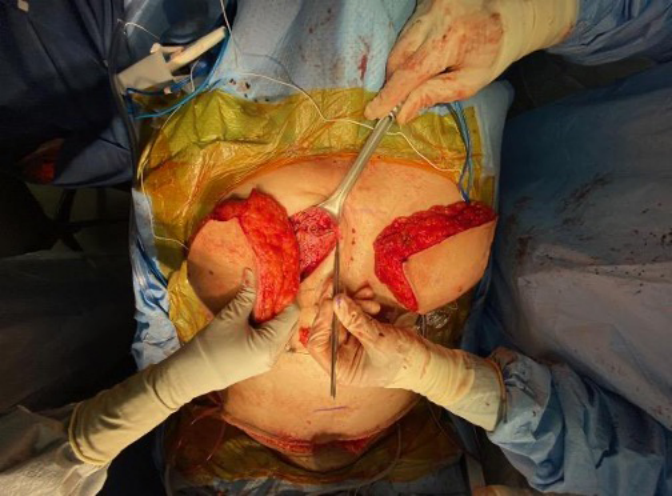

Supplement: gox-12-e5830-s001.pdf [file gox-12-e5830-s001.pdf]
